# Supplementary material
Source: publisher figshare collection journal article supplement (https://gsajournals.figshare.com/ndownloader/files/26510924)
Supplement: Supplementary file 1 [file 26510924]

## Sheet: Statistics per species
Supplementary Table 3. Summary of orthologous gene families search using OrthoFinder v2.2.6
	Pseudonectria foliicolaAR2711	Pseudonectria buxi AR2714	Neonectria faginata CBS 134246	Calonectria henricotiae CB045	Neonectria coccinea CBS 119158	Corinectria fuckeliana CBS 125109	Neonectria ditissima CBS 226.31	Neonectria hederae CBS 714.97	Calonectria pseudonaviculata CT1	Dactylonectria macrodidyma JAC15-245	Fusarium graminearum	Ilyonectria robusta	Coccinonectria pachysandricola JAC 16-16	Magnaporthe oryzae	Neurospora crassa	Neocosmospora solani 2_77-13-4	Sclerotinia sclerotiorum	Trichoderma reesei	Thelonectria rubi	Verticillium dahliae	Neonectria punicea
Number of genes	9272	9256	12991	17436	12942	11446	13669	11966	13063	16528	13322	17438	7908	11054	10785	16400	14503	9143	12973	10535	13180
Number of genes in orthogroups	8633	8703	12614	15845	12592	10861	12921	11571	12854	15686	11867	16119	7679	9487	8958	15400	8959	8545	11771	9519	12738
Number of unassigned genes	639	553	377	1591	350	585	748	395	209	842	1455	1319	229	1567	1827	1000	5544	598	1202	1016	442
Percentage of genes in orthogroups	93.1	94	97.1	90.9	97.3	94.9	94.5	96.7	98.4	94.9	89.1	92.4	97.1	85.8	83.1	93.9	61.8	93.5	90.7	90.4	96.6
Percentage of unassigned genes	6.9	6	2.9	9.1	2.7	5.1	5.5	3.3	1.6	5.1	10.9	7.6	2.9	14.2	16.9	6.1	38.2	6.5	9.3	9.6	3.4
Number of orthogroups containing species	7829	7798	10043	10456	10061	9117	10026	9557	9948	10449	9242	9443	7146	7783	7227	10242	7238	7434	9234	7964	10089
Percentage of orthogroups containing species	52.7	52.5	67.6	70.4	67.7	61.3	67.5	64.3	66.9	70.3	62.2	63.5	48.1	52.4	48.6	68.9	48.7	50	62.1	53.6	67.9
Number of species-specific orthogroups	0	2	2	10	0	1	1	0	0	1	4	3	0	7	26	6	10	3	0	5	0
Number of genes in species-specific orthogroups	0	5	14	23	0	2	2	0	0	2	9	6	0	25	72	16	41	8	0	15	0
Percentage of genes in species-specific orthogroups	0	0.1	0.1	0.1	0	0	0	0	0	0	0.1	0	0	0.2	0.7	0.1	0.3	0.1	0	0.1	0
Number of genes per-species in orthogroup	Number of orthogroups	Number of orthogroups	Number of orthogroups	Number of orthogroups	Number of orthogroups	Number of orthogroups	Number of orthogroups	Number of orthogroups	Number of orthogroups	Number of orthogroups	Number of orthogroups	Number of orthogroups	Number of orthogroups	Number of orthogroups	Number of orthogroups	Number of orthogroups	Number of orthogroups	Number of orthogroups	Number of orthogroups	Number of orthogroups	Number of orthogroups
'0	7033	7064	4819	4406	4801	5745	4836	5305	4914	4413	5620	5419	7716	7079	7635	4620	7624	7428	5628	6898	4773
'1	7197	7145	8624	7969	8579	8023	8399	8325	8444	8188	7749	6898	6764	6821	5960	8008	6474	6716	7843	6978	8592
'2	529	523	899	1459	974	755	1068	842	932	1219	992	1324	304	637	991	1213	529	528	884	691	975
'3	69	78	287	480	291	207	285	237	289	467	265	510	49	170	192	472	131	108	282	173	270
'4	18	20	112	212	111	73	134	76	135	246	114	257	14	73	54	217	36	37	102	61	132
'5	8	15	54	136	56	28	58	35	52	109	47	134	4	24	10	127	24	21	56	26	58
'6	4	9	26	69	13	9	31	12	33	72	28	87	4	24	5	68	10	9	30	15	22
'7	2	3	6	38	11	5	14	12	22	47	11	55	2	13	6	38	6	6	6	5	8
'8	0	2	9	27	5	4	12	6	11	30	8	42	2	7	5	22	6	3	9	5	10
'9	1	1	7	16	7	3	6	4	5	14	9	27	2	5	2	13	4	0	4	4	4
'10	0	1	3	9	4	3	3	1	5	6	4	30	0	2	0	11	3	4	3	2	6
2020-11-15	1	1	13	22	7	5	11	3	11	27	12	39	1	4	0	31	9	0	8	4	6
16-20	0	0	0	7	0	2	2	2	3	10	1	17	0	1	1	10	0	2	3	0	3
21-50	0	0	3	8	3	0	3	2	6	14	2	21	0	2	1	10	4	0	4	0	3
51-100	0	0	0	4	0	0	0	0	0	0	0	2	0	0	0	2	1	0	0	0	0
101-150	0	0	0	0	0	0	0	0	0	0	0	0	0	0	0	0	0	0	0	0	0
151-200	0	0	0	0	0	0	0	0	0	0	0	0	0	0	0	0	0	0	0	0	0
201-500	0	0	0	0	0	0	0	0	0	0	0	0	0	0	0	0	1	0	0	0	0
501-1000	0	0	0	0	0	0	0	0	0	0	0	0	0	0	0	0	0	0	0	0	0
'1001+	0	0	0	0	0	0	0	0	0	0	0	0	0	0	0	0	0	0	0	0	0
Number of genes per-species in orthogroup	Percentage of orthogroups	Percentage of orthogroups	Percentage of orthogroups	Percentage of orthogroups	Percentage of orthogroups	Percentage of orthogroups	Percentage of orthogroups	Percentage of orthogroups	Percentage of orthogroups	Percentage of orthogroups	Percentage of orthogroups	Percentage of orthogroups	Percentage of orthogroups	Percentage of orthogroups	Percentage of orthogroups	Percentage of orthogroups	Percentage of orthogroups	Percentage of orthogroups	Percentage of orthogroups	Percentage of orthogroups	Percentage of orthogroups
'0	47.3	47.5	32.4	29.6	32.3	38.7	32.5	35.7	33.1	29.7	37.8	36.5	51.9	47.6	51.4	31.1	51.3	50	37.9	46.4	32.1
'1	48.4	48.1	58	53.6	57.7	54	56.5	56	56.8	55.1	52.1	46.4	45.5	45.9	40.1	53.9	43.6	45.2	52.8	47	57.8
'2	3.6	3.5	6	9.8	6.6	5.1	7.2	5.7	6.3	8.2	6.7	8.9	2	4.3	6.7	8.2	3.6	3.6	5.9	4.6	6.6
'3	0.5	0.5	1.9	3.2	2	1.4	1.9	1.6	1.9	3.1	1.8	3.4	0.3	1.1	1.3	3.2	0.9	0.7	1.9	1.2	1.8
'4	0.1	0.1	0.8	1.4	0.7	0.5	0.9	0.5	0.9	1.7	0.8	1.7	0.1	0.5	0.4	1.5	0.2	0.2	0.7	0.4	0.9
'5	0.1	0.1	0.4	0.9	0.4	0.2	0.4	0.2	0.3	0.7	0.3	0.9	0	0.2	0.1	0.9	0.2	0.1	0.4	0.2	0.4
'6	0	0.1	0.2	0.5	0.1	0.1	0.2	0.1	0.2	0.5	0.2	0.6	0	0.2	0	0.5	0.1	0.1	0.2	0.1	0.1
'7	0	0	0	0.3	0.1	0	0.1	0.1	0.1	0.3	0.1	0.4	0	0.1	0	0.3	0	0	0	0	0.1
'8	0	0	0.1	0.2	0	0	0.1	0	0.1	0.2	0.1	0.3	0	0	0	0.1	0	0	0.1	0	0.1
'9	0	0	0	0.1	0	0	0	0	0	0.1	0.1	0.2	0	0	0	0.1	0	0	0	0	0
'10	0	0	0	0.1	0	0	0	0	0	0	0	0.2	0	0	0	0.1	0	0	0	0	0
2020-11-15	0	0	0.1	0.1	0	0	0.1	0	0.1	0.2	0.1	0.3	0	0	0	0.2	0.1	0	0.1	0	0
16-20	0	0	0	0	0	0	0	0	0	0.1	0	0.1	0	0	0	0.1	0	0	0	0	0
21-50	0	0	0	0.1	0	0	0	0	0	0.1	0	0.1	0	0	0	0.1	0	0	0	0	0
51-100	0	0	0	0	0	0	0	0	0	0	0	0	0	0	0	0	0	0	0	0	0
101-150	0	0	0	0	0	0	0	0	0	0	0	0	0	0	0	0	0	0	0	0	0
151-200	0	0	0	0	0	0	0	0	0	0	0	0	0	0	0	0	0	0	0	0	0
201-500	0	0	0	0	0	0	0	0	0	0	0	0	0	0	0	0	0	0	0	0	0
501-1000	0	0	0	0	0	0	0	0	0	0	0	0	0	0	0	0	0	0	0	0	0
'1001+	0	0	0	0	0	0	0	0	0	0	0	0	0	0	0	0	0	0	0	0	0
Number of genes per-species in orthogroup	Number of genes	Number of genes	Number of genes	Number of genes	Number of genes	Number of genes	Number of genes	Number of genes	Number of genes	Number of genes	Number of genes	Number of genes	Number of genes	Number of genes	Number of genes	Number of genes	Number of genes	Number of genes	Number of genes	Number of genes	Number of genes
'0	0	0	0	0	0	0	0	0	0	0	0	0	0	0	0	0	0	0	0	0	0
'1	7197	7145	8624	7969	8579	8023	8399	8325	8444	8188	7749	6898	6764	6821	5960	8008	6474	6716	7843	6978	8592
'2	1058	1046	1798	2918	1948	1510	2136	1684	1864	2438	1984	2648	608	1274	1982	2426	1058	1056	1768	1382	1950
'3	207	234	861	1440	873	621	855	711	867	1401	795	1530	147	510	576	1416	393	324	846	519	810
'4	72	80	448	848	444	292	536	304	540	984	456	1028	56	292	216	868	144	148	408	244	528
'5	40	75	270	680	280	140	290	175	260	545	235	670	20	120	50	635	120	105	280	130	290
'6	24	54	156	414	78	54	186	72	198	432	168	522	24	144	30	408	60	54	180	90	132
'7	14	21	42	266	77	35	98	84	154	329	77	385	14	91	42	266	42	42	42	35	56
'8	0	16	72	216	40	32	96	48	88	240	64	336	16	56	40	176	48	24	72	40	80
'9	9	9	63	144	63	27	54	36	45	126	81	243	18	45	18	117	36	0	36	36	36
'10	0	10	30	90	40	30	30	10	50	60	40	300	0	20	0	110	30	40	30	20	60
2020-11-15	12	13	171	267	89	63	137	36	137	346	148	481	12	51	0	388	112	0	100	45	72
16-20	0	0	0	122	0	34	36	39	51	168	17	307	0	16	18	163	0	36	53	0	50
21-50	0	0	79	215	81	0	68	47	156	429	53	626	0	47	26	270	121	0	113	0	82
51-100	0	0	0	256	0	0	0	0	0	0	0	145	0	0	0	149	63	0	0	0	0
101-150	0	0	0	0	0	0	0	0	0	0	0	0	0	0	0	0	0	0	0	0	0
151-200	0	0	0	0	0	0	0	0	0	0	0	0	0	0	0	0	0	0	0	0	0
201-500	0	0	0	0	0	0	0	0	0	0	0	0	0	0	0	0	258	0	0	0	0
501-1000	0	0	0	0	0	0	0	0	0	0	0	0	0	0	0	0	0	0	0	0	0
'1001+	0	0	0	0	0	0	0	0	0	0	0	0	0	0	0	0	0	0	0	0	0
Number of genes per-species in orthogroup	Percentage of genes	Percentage of genes	Percentage of genes	Percentage of genes	Percentage of genes	Percentage of genes	Percentage of genes	Percentage of genes	Percentage of genes	Percentage of genes	Percentage of genes	Percentage of genes	Percentage of genes	Percentage of genes	Percentage of genes	Percentage of genes	Percentage of genes	Percentage of genes	Percentage of genes	Percentage of genes	Percentage of genes
'0	0	0	0	0	0	0	0	0	0	0	0	0	0	0	0	0	0	0	0	0	0
'1	77.6	77.2	66.4	45.7	66.3	70.1	61.4	69.6	64.6	49.5	58.2	39.6	85.5	61.7	55.3	48.8	44.6	73.5	60.5	66.2	65.2
'2	11.4	11.3	13.8	16.7	15.1	13.2	15.6	14.1	14.3	14.8	14.9	15.2	7.7	11.5	18.4	14.8	7.3	11.5	13.6	13.1	14.8
'3	2.2	2.5	6.6	8.3	6.7	5.4	6.3	5.9	6.6	8.5	6	8.8	1.9	4.6	5.3	8.6	2.7	3.5	6.5	4.9	6.1
'4	0.8	0.9	3.4	4.9	3.4	2.6	3.9	2.5	4.1	6	3.4	5.9	0.7	2.6	2	5.3	1	1.6	3.1	2.3	4
'5	0.4	0.8	2.1	3.9	2.2	1.2	2.1	1.5	2	3.3	1.8	3.8	0.3	1.1	0.5	3.9	0.8	1.1	2.2	1.2	2.2
'6	0.3	0.6	1.2	2.4	0.6	0.5	1.4	0.6	1.5	2.6	1.3	3	0.3	1.3	0.3	2.5	0.4	0.6	1.4	0.9	1
'7	0.2	0.2	0.3	1.5	0.6	0.3	0.7	0.7	1.2	2	0.6	2.2	0.2	0.8	0.4	1.6	0.3	0.5	0.3	0.3	0.4
'8	0	0.2	0.6	1.2	0.3	0.3	0.7	0.4	0.7	1.5	0.5	1.9	0.2	0.5	0.4	1.1	0.3	0.3	0.6	0.4	0.6
'9	0.1	0.1	0.5	0.8	0.5	0.2	0.4	0.3	0.3	0.8	0.6	1.4	0.2	0.4	0.2	0.7	0.2	0	0.3	0.3	0.3
'10	0	0.1	0.2	0.5	0.3	0.3	0.2	0.1	0.4	0.4	0.3	1.7	0	0.2	0	0.7	0.2	0.4	0.2	0.2	0.5
2020-11-15	0.1	0.1	1.3	1.5	0.7	0.6	1	0.3	1	2.1	1.1	2.8	0.2	0.5	0	2.4	0.8	0	0.8	0.4	0.5
16-20	0	0	0	0.7	0	0.3	0.3	0.3	0.4	1	0.1	1.8	0	0.1	0.2	1	0	0.4	0.4	0	0.4
21-50	0	0	0.6	1.2	0.6	0	0.5	0.4	1.2	2.6	0.4	3.6	0	0.4	0.2	1.6	0.8	0	0.9	0	0.6
51-100	0	0	0	1.5	0	0	0	0	0	0	0	0.8	0	0	0	0.9	0.4	0	0	0	0
101-150	0	0	0	0	0	0	0	0	0	0	0	0	0	0	0	0	0	0	0	0	0
151-200	0	0	0	0	0	0	0	0	0	0	0	0	0	0	0	0	0	0	0	0	0
201-500	0	0	0	0	0	0	0	0	0	0	0	0	0	0	0	0	1.8	0	0	0	0
501-1000	0	0	0	0	0	0	0	0	0	0	0	0	0	0	0	0	0	0	0	0	0
'1001+	0	0	0	0	0	0	0	0	0	0	0	0	0	0	0	0	0	0	0	0	0
